# Supplementary material for: A novel T4(1)6(1) water tape encapsulated in a (3,3)-connected 2D copper metal–organic framework
Source: Royal Society of Chemistry journal article supplement (doi:10.1039/c1ce05866e), 2011-11-09
Supplement: c1ce05866e.pdf [file c1ce05866e.pdf]

# Supporting Information

## A novel T4(1)6(1) water tape encapsulated in a (3,3)-connected 2D copper metal-organic framework

Xia Zhu, Yun-Fei Feng, Min Li, Bao-Long Li\* and Yong Zhang  
*Key Laboratory of Organic Synthesis of Jiangsu Province, College of Chemistry,  
Chemical Engineering and Materials Science, Soochow University, Suzhou 215123,  
China.*

**Table S1. Selected bond lengths [Å] and angles [°] for 1.**

|                   |          |                     |           |
|-------------------|----------|---------------------|-----------|
| Cu(1)-N(1)        | 2.014(5) | Cu(1)-N(8)#1        | 1.991(5)  |
| Cu(1)-O(1)        | 2.011(4) | Cu(1)-O(2)          | 1.970(5)  |
| Cu(1)-N(6)#2      | 2.198(5) |                     |           |
| N(8)#1-Cu(1)-N(1) | 94.1(2)  | O(1)-Cu(1)-N(1)     | 156.5(2)  |
| O(2)-Cu(1)-N(1)   | 95.8(2)  | N(8)#1-Cu(1)-O(1)   | 97.3(2)   |
| O(2)-Cu(1)-N(8)#1 | 154.9(2) | O(2)-Cu(1)-O(1)     | 66.12(19) |
| N(1)-Cu(1)-N(6)#2 | 99.6(2)  | N(8)#1-Cu(1)-N(6)#2 | 101.9(2)  |
| O(1)-Cu(1)-N(6)#2 | 98.0(2)  | O(2)-Cu(1)-N(6)#2   | 99.1(2)   |

Symmetry transformations used to generate equivalent atoms: #1  $-x+3/2, y-1/2, -z+3/2$ ;  
#2  $x+1/2, -y+1/2, z+1/2$ .

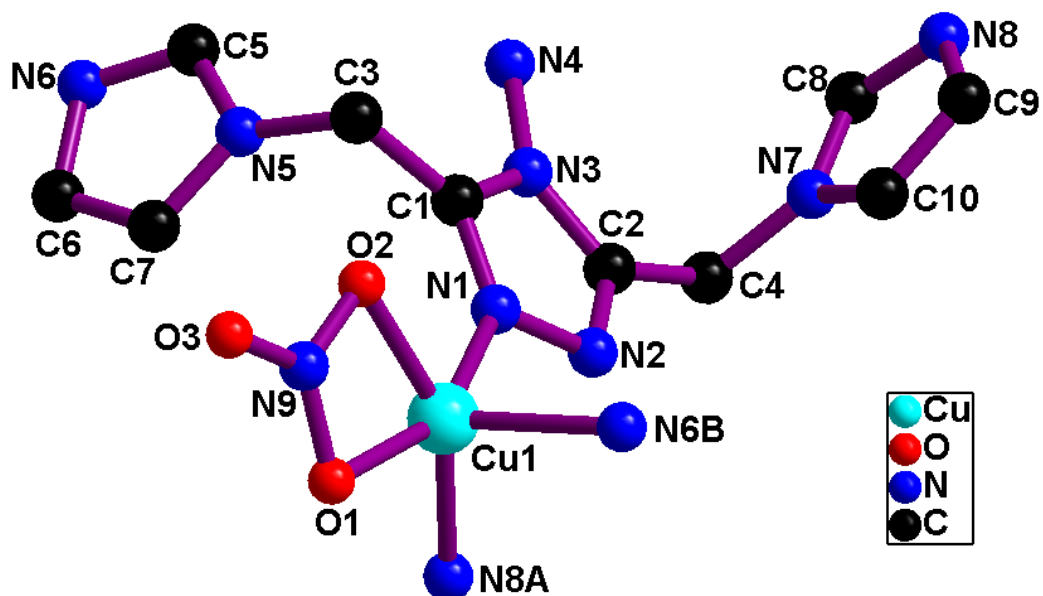

Figure S1. The coordination environment of the copper atom in 1.

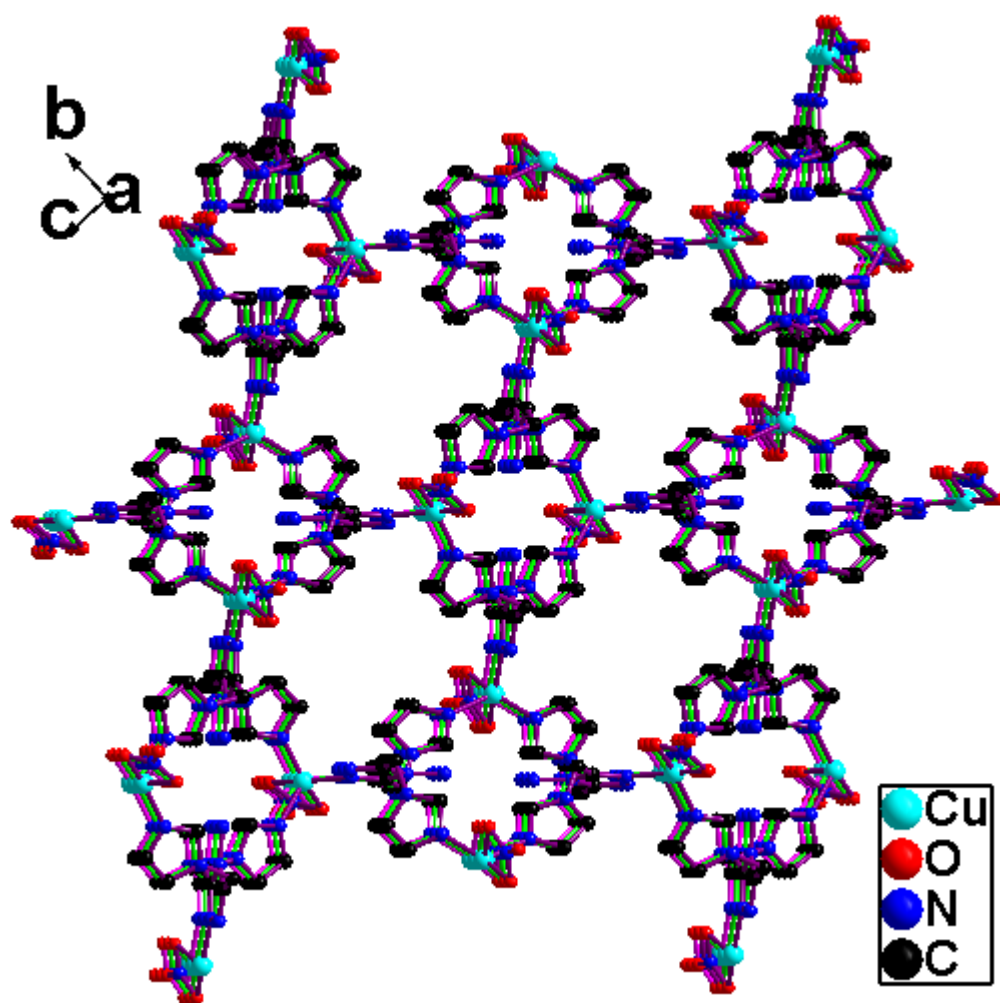

**Figure S2.** The parallel packed of the 2D network in **1**.

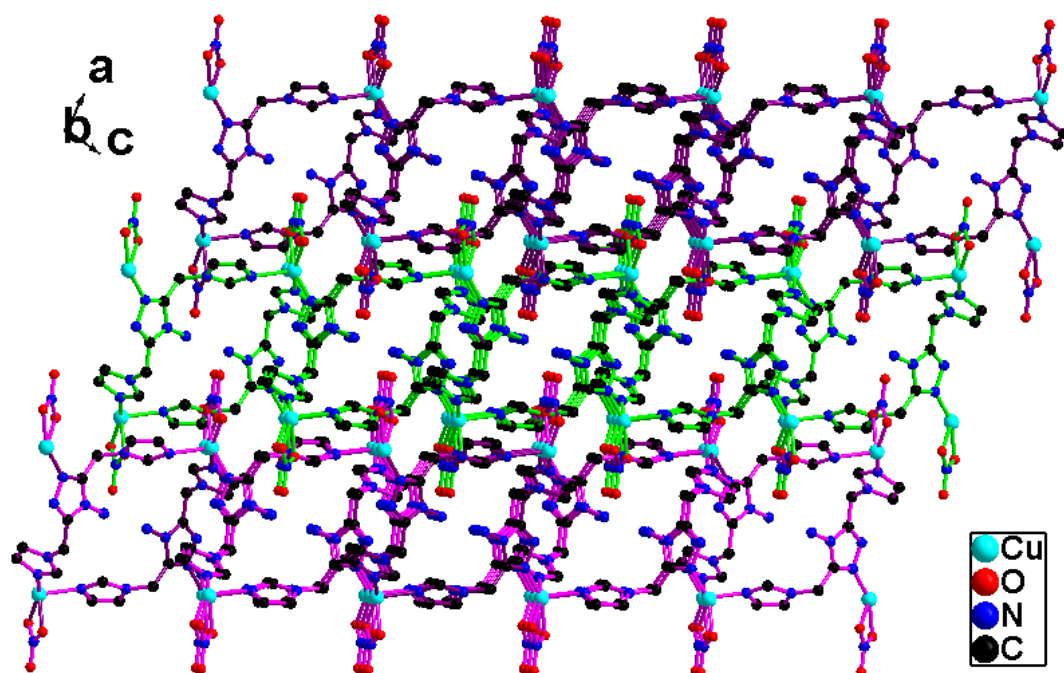

**Figure S3.** Viewing the packed of the 2D network in **1** along the *b* direction.

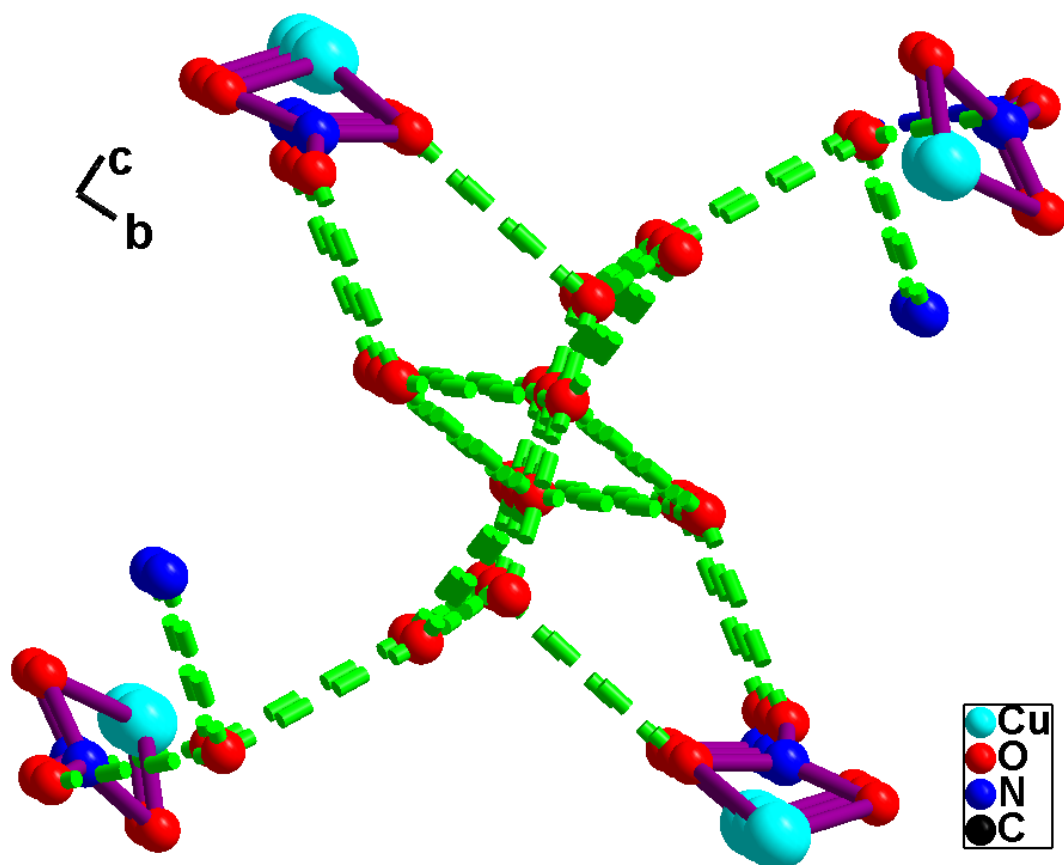

**Figure S4.** Viewing the hydrogen bond interactions between tape water and the nitrate/triazole nitrogen atoms along the *a* direction.

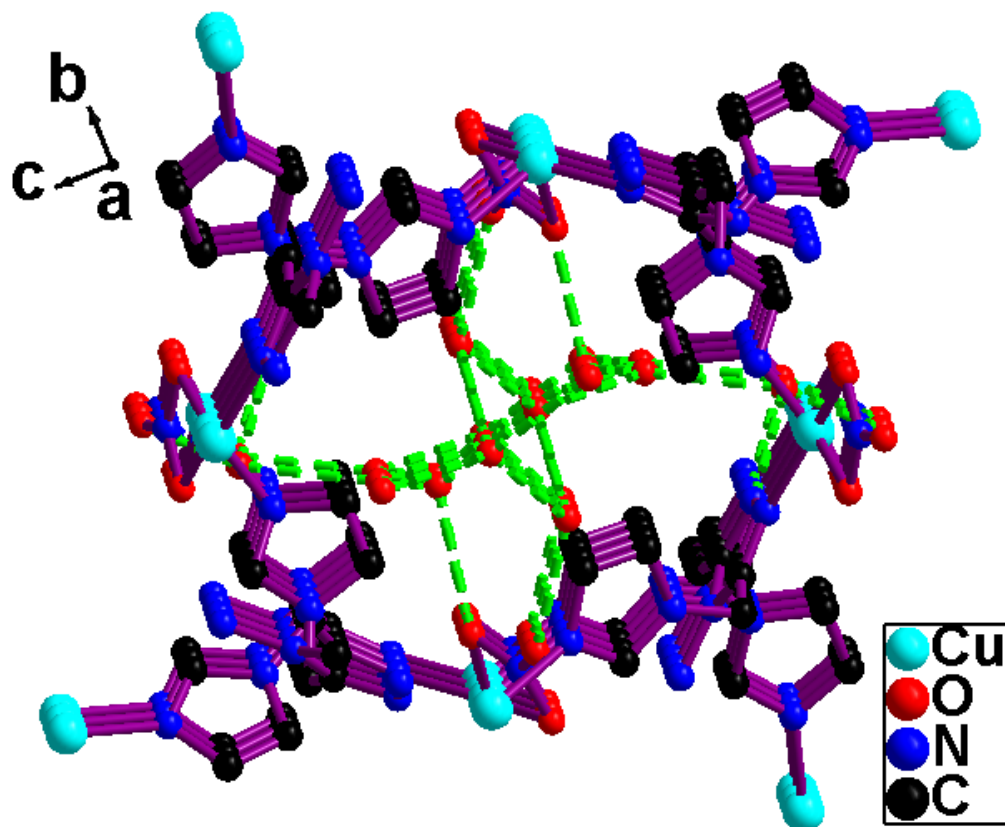

**Figure S5** A water tape joins the adjacent 2D network via the hydrogen bond interactions, viewing along the *a* direction.

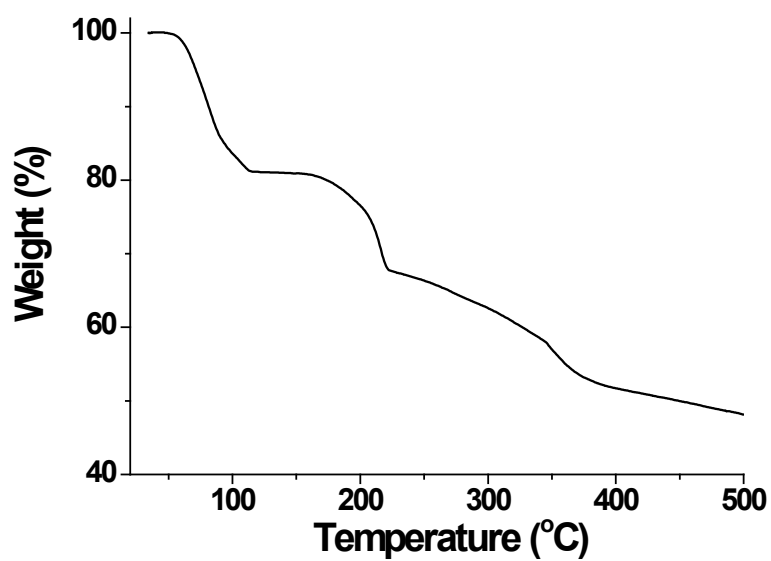

**Figure S6.** TG curve of 1.
